# Supplementary material for: Antibiotic exposures and the development of pediatric autoimmune diseases: a register-based case–control study
Source: PubMed Central journal article supplement (PMC10033398; doi:10.1038/s41390-022-02188-4), 2022-07-19
Supplement: 41390_2022_2188_MOESM1_ESM.pdf [file 41390_2022_2188_MOESM1_ESM.pdf]

**Supplementary Table 1.** Number and types of antibiotic purchases before index date<sup>a</sup> in the matched case-control study of 950 children as compared with antibiotic purchases in the whole Fin-HIT cohort of 11 407 children (born 2000-2005) from birth until 31 December 2018.

| Antibiotic types                                                                      | Number of antibiotic purchases before index date <sup>a</sup> in the matched case-control study | Number of all antibiotic purchases in the Fin-HIT cohort |
|---------------------------------------------------------------------------------------|-------------------------------------------------------------------------------------------------|----------------------------------------------------------|
|                                                                                       | <b>N= 8 604 (%)</b>                                                                             | <b>N=130 440 (%)</b>                                     |
| <b>Penicillins, N(%)</b>                                                              | 3 453 (100) – <b>40.1%</b>                                                                      | 52 633 (100) – <b>40.4%</b>                              |
| <i>Phenoxymethylpenicillin (J01CE02)</i>                                              | 431 (12.5)                                                                                      | 8 399 (16.0)                                             |
| <i>Amoxicillin (J01CA04)</i>                                                          | 3 009 (87.1)                                                                                    | 43 657 (82.9)                                            |
| <i>Flucloxacillin (J01CF05)</i>                                                       | 0                                                                                               | 42 (0.1)                                                 |
| <i>Pivmesillinam (J01CA08)</i>                                                        | 13 (0.4)                                                                                        | 535 (1.0)                                                |
| <b>Macrolides, N(%)</b>                                                               | 1 949 (100) – <b>22.7%</b>                                                                      | 26 318 (100) – <b>20.2%</b>                              |
| <i>Erythromycin (J01FA01)</i>                                                         | 2 (0.1)                                                                                         | 56 (0.2)                                                 |
| <i>Roxithromycin (J01FA06)</i>                                                        | 4 (0.2)                                                                                         | 188 (0.7)                                                |
| <i>Clarithromycin (J01FA09)</i>                                                       | 229 (11.7)                                                                                      | 3 737 (14.2)                                             |
| <i>Azithromycin (J01FA10)</i>                                                         | 1 714 (87.9)                                                                                    | 22 325 (84.8)                                            |
| <i>Telithromycin (J01FA15)</i>                                                        | 0                                                                                               | 12 (0.0)                                                 |
| <b>Amoxicillin-clavulanic acid (J01CR02), N(%)</b>                                    | 1 295 (100) – <b>15.1%</b>                                                                      | 18 262 (100) – <b>14.0%</b>                              |
| <b>Cephalosporines, N(%)</b>                                                          | 1 202 (100) – <b>14.0%</b>                                                                      | 20 993 (100) – <b>16.1%</b>                              |
| <i>Cephalexin (J01DA01)</i>                                                           | 1 023 (85.1)                                                                                    | 18 713 (89.1)                                            |
| <i>Cefuroxime (J01DA06)</i>                                                           | 33 (2.7)                                                                                        | 435 (2.1)                                                |
| <i>Cefaclor (J01DA08)</i>                                                             | 115 (9.6)                                                                                       | 1 500 (7.1)                                              |
| <i>Cefadroxil (J01DA09)</i>                                                           | 30 (2.5)                                                                                        | 338 (1.6)                                                |
| <i>Ceftriaxone (J01DA39 and J01DA63)</i>                                              | 1 (0.1)                                                                                         | 7 (0.0)                                                  |
| <b>Sulphonamides and trimethoprim, N(%)</b>                                           | 168 (100) – <b>7.2%</b>                                                                         | 8 958 (100) – <b>6.9%</b>                                |
| <i>Trimethoprim (J01EA01)</i>                                                         | 65 (10.5)                                                                                       | 860 (9.6)                                                |
| <i>Trimethoprim sulphate (J01EE01 and J01EE02)</i>                                    | 553 (89.5)                                                                                      | 8 098 (90.4)                                             |
| <b>Tetracyclins, N(%)</b>                                                             | 54 (100) – <b>0.6%</b>                                                                          | 2 555 (100) – <b>2%</b>                                  |
| <i>Doxicyclin (J01AA02)</i>                                                           | 30 (55.6)                                                                                       | 1 097 (42.9)                                             |
| <i>Lymecyclin (J01AA04)</i>                                                           | 20 (37.0)                                                                                       | 1 049 (41.1)                                             |
| <i>Tetracyclin (J01AA07)</i>                                                          | 4 (7.4)                                                                                         | 409 (16.0)                                               |
| <b>Clindamycin (J01FF01), N(%)</b>                                                    | 23 (100) – <b>0.3%</b>                                                                          | 443 (100) – <b>0.3%</b>                                  |
| <b>Fluoroquinolones</b>                                                               | 4 (100) – <b>0.0%</b>                                                                           | 220 (100) – <b>0.2%</b>                                  |
| <i>Ciprofloxacin (J01MA01 and J01MA02)</i>                                            | 4 (100)                                                                                         | 193 (87.7)                                               |
| <i>Levofloxacin (J01MA02)</i>                                                         | 0                                                                                               | 19 (8.6)                                                 |
| <i>Moxifloxacin (J01MA14)</i>                                                         | 0                                                                                               | 8 (3.6)                                                  |
| <b>Others (nitrofurantoin (J01XE01) and metronidazole (J01XD01 and P01AB01), N(%)</b> | 6 (100) – <b>0.1%</b>                                                                           | 58 (100) – <b>0.0%</b>                                   |

<sup>a</sup>Index date= date of diagnosis for children who developed autoimmune diseases and compatible date for their matching controls.

**Supplementary Table 2.** Association between types and age of first antibiotic purchase and the onset of autoimmune diseases (DM, AIT, JIA, and IBD).

| First antibiotic purchase      | AD<br>(N=242)       | Matched controls<br>(N=708) | DM<br>(N=102)       | Matched DM controls<br>(N=280) | AIT<br>(N=68)       | Matched AIT controls<br>(N=190) | JIA<br>(N=54)       | Matched JIA controls<br>(N=156) | IBD<br>(N=27)       | Matched IBD controls<br>(N=73) |
|--------------------------------|---------------------|-----------------------------|---------------------|--------------------------------|---------------------|---------------------------------|---------------------|---------------------------------|---------------------|--------------------------------|
| <b>Median age, years (IQR)</b> | 1.06<br>(0.65-1.82) | 1.00<br>(0.65-1.69)         | 1.09<br>(0.71-1.84) | 1.02<br>(0.68-1.85)            | 1.10<br>(0.74-2.09) | 0.97<br>(0.60-1.68)             | 0.84<br>(0.50-1.30) | 1.11<br>(0.65-1.70)             | 1.15<br>(0.72-1.87) | 0.88<br>(0.56-1.56)            |
| <b>Antibiotic type, N(%)</b>   |                     |                             |                     |                                |                     |                                 |                     |                                 |                     |                                |
| No antibiotics                 | 14 (5.8)            | 34 (4.8)                    | 9 (8.8)             | 16 (5.7)                       | 2 (2.9)             | 4 (2.1)                         | 4 (7.4)             | 11 (7.1)                        | 0                   | 2 (2.7)                        |
| Penicillin                     | 133 (55.0)          | 386 (54.5)                  | 56 (54.9)           | 157 (56.1)                     | 40 (58.8)           | 93 (49.0)                       | 27 (50.0)           | 85 (54.5)                       | 16 (59.3)           | 45 (61.6)                      |
| Cephalosporine                 | 15 (6.2)            | 58 (8.2)                    | 6 (5.9)             | 21 (7.5)                       | 4 (5.9)             | 20 (10.5)                       | 4 (7.4)             | 13 (8.3)                        | 1 (3.7)             | 4 (5.5)                        |
| Macrolide                      | 51 (21.1)           | 135 (19.0)                  | 25 (24.5)           | 57 (20.4)                      | 14 (20.6)           | 43 (22.6)                       | 11 (20.4)           | 21 (13.5)                       | 2 (7.4)             | 12 (16.4)                      |
| Amoxicillin-clavulanic acid    | 25 (10.3)           | 85 (12.0)                   | 5 (4.9)             | 23 (8.2)                       | 7 (10.3)            | 28 (14.7)                       | 6 (11.1)            | 25 (16.0)                       | 8 (29.6)            | 9 (12.3)                       |
| Sulphonamides and trimethoprim | 4 (1.6)             | 10 (1.4)                    | 1 (1.0)             | 6 (2.1)                        | 1 (1.5)             | 1 (0.5)                         | 2 (3.7)             | 1 (0.6)                         | 0                   | 1 (1.4)                        |
| Others                         | 0                   | 1 (0.1)                     | 0                   | 0                              | 0                   | 1 (0.5)                         | 0                   | 0                               | 0                   | 0                              |

AD=autoimmune diseases. Cases=children with ADs (represented with DM (type 1 diabetes mellitus), AIT (autoimmune thyroiditis), JIA (juvenile idiopathic arthritis), and IBD (inflammatory bowel diseases)). Nine children had two diagnoses. IQR=Interquartile Range. The association between types of first antibiotics and the onset of ADs were estimated using conditional logistic regression with penicillin as reference. P>0.05 in every analysis comparing cases and matched controls.

**Supplementary Table 3.** Additional information for Figure 3. Association between types of antibiotic purchases in different periods and the development of an autoimmune disease (AD), represented by type 1 diabetes (DM), autoimmune thyroiditis (AIT), juvenile idiopathic arthritis (JIA), or inflammatory bowel diseases (IBD)<sup>a</sup>.

| Antibiotic types in different periods                              | AD (N=242)              | DM (N=102)       | AIT (N=68)       | JIA (N=54)       | IBD (N=27)       |
|--------------------------------------------------------------------|-------------------------|------------------|------------------|------------------|------------------|
|                                                                    | OR (95%CI) <sup>b</sup> | OR (95%CI)       | OR (95%CI)       | OR (95%CI)       | OR (95%CI)       |
| <b>Throughout childhood (From birth to index date<sup>c</sup>)</b> |                         |                  |                  |                  |                  |
| Penicillin                                                         | 1.01 (0.96-1.06)        | 1.05 (0.97-1.14) | 0.96 (0.88-1.05) | 1.06 (0.94-1.19) | 1.00 (0.87-1.14) |
| Cephalosporine                                                     | 1.03 (0.95-1.12)        | 1.04 (0.88-1.22) | 0.93 (0.82-1.06) | 1.25 (1.03-1.52) | 1.16 (0.88-1.52) |
| Macrolide                                                          | 1.04 (0.90-1.09)        | 1.04 (0.94-1.16) | 0.97 (0.88-1.08) | 1.21 (1.06-1.38) | 1.03 (0.94-1.13) |
| Amoxicillin-Clavulanic acid                                        | 1.05 (0.98-1.13)        | 1.02 (0.88-1.18) | 0.97 (0.85-1.10) | 1.19 (1.02-1.39) | 1.15 (0.98-1.34) |
| Sulphonamides and trimethoprim                                     | 1.08 (1.00-1.16)        | 1.12 (0.98-1.29) | 1.04 (0.94-1.14) | 1.31 (0.96-1.78) | 1.09 (0.82-1.45) |
| <b>Infancy (&lt;age of 1 year)</b>                                 |                         |                  |                  |                  |                  |
| Penicillin                                                         | 1.45 (0.90-2.32)        | 0.90 (0.62-1.30) | 0.77 (0.49-1.23) | 1.06 (0.68-1.65) | 0.53 (0.23-1.19) |
| Cephalosporine                                                     | 0.94 (0.64-1.38)        | 0.76 (0.37-1.57) | 0.68 (0.30-1.51) | 2.54 (1.01-6.38) | 0.50 (0.08-3.00) |
| Macrolide                                                          | 1.00 (0.78-1.28)        | 0.87 (0.57-1.32) | 0.83 (0.53-1.31) | 1.80 (1.08-3.01) | 0.47 (0.14-1.61) |
| Amoxicillin-Clavulanic acid                                        | 1.07 (0.77-1.49)        | 0.65 (0.30-1.41) | 0.65 (0.30-1.38) | 1.93 (1.12-3.32) | 1.17 (0.34-4.03) |
| Sulphonamides and trimethoprim                                     | 1.26 (0.89-1.78)        | 1.15 (0.70-1.87) | 0.65 (0.30-1.38) | 1.21 (0.19-7.58) | 0.50 (0.01-23.6) |
| <b>Toddler phase (From age of 1 up to third birthday)</b>          |                         |                  |                  |                  |                  |
| Penicillin                                                         | 1.06 (0.95-1.19)        | 1.15 (0.97-1.35) | 1.08 (0.85-1.38) | 1.02 (0.77-1.35) | 1.03 (0.76-1.40) |
| Cephalosporine                                                     | 1.11 (0.92-1.33)        | 1.05 (0.78-1.41) | 0.76 (0.51-1.12) | 1.69 (1.15-2.48) | 1.57 (0.81-3.03) |
| Macrolide                                                          | 1.09 (0.97-1.21)        | 1.09 (0.91-1.31) | 1.01 (0.84-1.21) | 1.40 (1.09-1.79) | 0.83 (0.58-1.19) |
| Amoxicillin-Clavulanic acid                                        | 1.18 (1.01-1.37)        | 1.22 (0.98-1.54) | 0.94 (0.70-1.25) | 1.43 (1.03-2.00) | 1.30 (0.79-2.15) |
| Sulphonamides and trimethoprim                                     | 1.10 (0.94-1.29)        | 1.10 (0.84-1.44) | 1.12 (0.89-1.41) | 1.63 (0.77-3.47) | 0.91 (0.46-1.77) |
| <b>Preschool to adolescence (From age 3 years to index date)</b>   |                         |                  |                  |                  |                  |
| Penicillin                                                         | 1.01 (0.94-1.08)        | 1.04 (0.92-1.17) | 0.94 (0.84-1.06) | 1.09 (0.94-1.28) | 1.02 (0.86-1.22) |
| Cephalosporine                                                     | 1.02 (0.92-1.13)        | 1.07 (0.87-1.33) | 0.97 (0.84-1.12) | 1.12 (0.86-1.46) | 1.13 (0.84-1.53) |
| Macrolide                                                          | 1.04 (0.97-1.12)        | 1.09 (0.89-1.33) | 0.94 (0.70-1.12) | 1.19 (0.98-1.45) | 1.06 (0.95-1.18) |
| Amoxicillin-Clavulanic acid                                        | 1.03 (0.93-1.13)        | 0.89 (0.69-1.16) | 1.00 (0.84-1.19) | 1.12 (0.91-1.38) | 1.18 (0.98-1.42) |
| Sulphonamides and trimethoprim                                     | 1.10 (0.98-1.24)        | 1.35 (1.03-1.77) | 1.00 (0.84-1.16) | 1.26 (0.89-1.78) | 1.45 (0.90-2.32) |
| <b>Purchases within 2 years before index date</b>                  |                         |                  |                  |                  |                  |
| Penicillin                                                         | 0.96 (0.80-1.14)        | 0.81 (0.61-1.08) | 1.03 (0.71-1.50) | 1.19 (0.84-1.71) | 0.97 (0.58-1.62) |
| Cephalosporine                                                     | 1.19 (0.98-1.45)        | 1.22 (0.94-1.57) | 1.15 (0.78-1.71) | 1.01 (0.56-1.82) | 2.19 (0.90-5.32) |
| Macrolide                                                          | 1.24 (1.01-1.51)        | 1.12 (0.83-1.51) | 0.87 (0.38-2.03) | 1.35 (0.91-2.00) | 1.29 (0.81-2.04) |
| Amoxicillin-Clavulanic acid                                        | 1.04 (0.83-1.31)        | 1.01(0.70-1.48)  | 0.44 (0.17-1.11) | 1.33 (0.92-1.93) | 1.23 (0.45-3.39) |
| Sulphonamides and trimethoprim                                     | 1.15 (0.84-1.57)        | 0.60 (0.22-1.64) | 1.19 (0.80-1.76) | 1.25 (0.64-2.44) | 8.08 (infinity)  |

<sup>a</sup> Cases=children with ADs (DM, AIT, JIA or IBD). Nine children had two diagnoses

<sup>b</sup> OR=Odds ratio, CI= 95% Confidence Interval. Analyses was performed using conditional logistic regression.

<sup>c</sup> Index date= date of diagnosis for children who developed autoimmune diseases and compatible date for their matching controls.

## Supplementary Figure 1

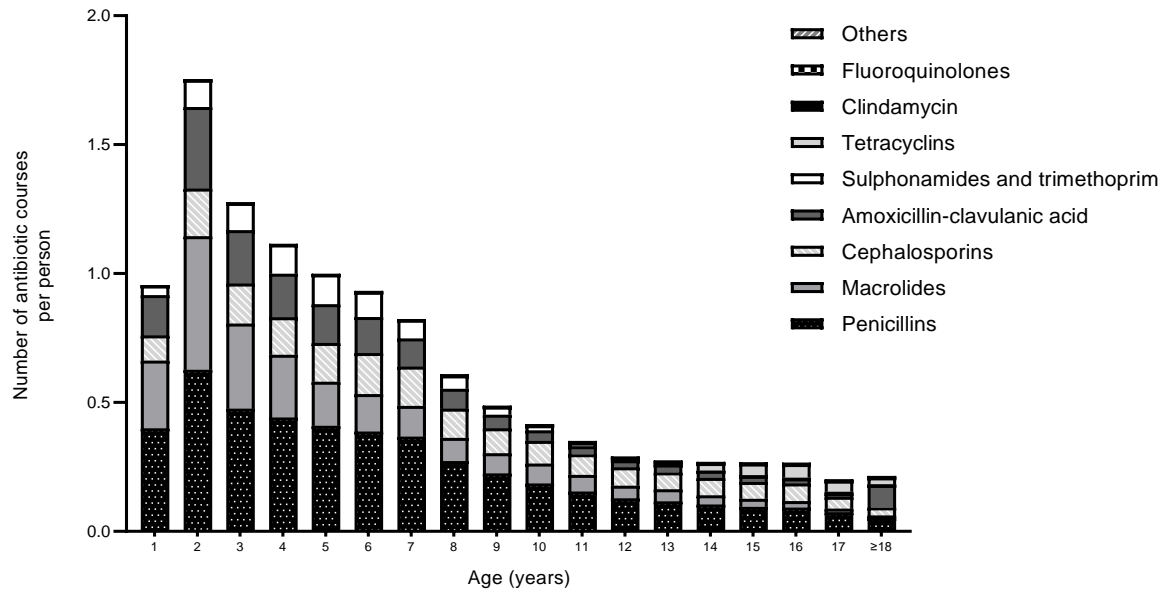

Title: All purchased per person antibiotics in the cohort of 11,407 children born in 2000-2005. Number of tetracyclin, clindamycin, fluoroquinolone, and other antibiotics purchases were low.
